# Supplementary material
Source: PubMed Central journal article supplement (PMC5553449)
Supplement: NIHMS878309-supplement.pdf [file NIHMS878309-supplement.pdf]

## Supplementary Materials

**Title:** The effects of acute psychological stress on circulating and stimulated inflammatory markers: A systematic review and meta-analysis

### Table of Contents

|                                                                                               |                                      |
|-----------------------------------------------------------------------------------------------|--------------------------------------|
| <b>Study Selection</b> .....                                                                  | <b>2</b>                             |
| Figure S1: Flow diagram of circulating study search and inclusion.....                        | 2                                    |
| Figure S2: Flow of diagram of stimulated study search and inclusion.....                      | 3                                    |
| <b>Included Studies</b> .....                                                                 | <b>4</b>                             |
| Table S1: Summary of studies measuring circulating inflammatory markers.....                  | 4                                    |
| Table S2: Summary of studies measuring stimulated inflammatory markers.....                   | 7                                    |
| Table S3: Assays used to assess circulating levels of interleukin-6.....                      | 9                                    |
| <b>Results of Meta-Regression</b> .....                                                       | <b>12</b>                            |
| Figure S3: Meta-regression with age regressed onto effect size for acute stress on IL-6 ..... | 12                                   |
| Figure S4: Meta-regression with sex regressed onto effect size for acute stress on IL-6.....  | 133                                  |
| <b>Identified Moderators</b> .....                                                            | <b>144</b>                           |
| Table S4: Moderators of circulating inflammatory response .....                               | 144                                  |
| Table S5: Moderators of stimulated inflammatory response.....                                 | 166                                  |
| <b>Publication Bias Results</b> .....                                                         | <b>Error! Bookmark not defined.9</b> |
| Figure S5: Funnel plots.....                                                                  | <b>Error! Bookmark not defined.9</b> |
| Table S5: Publication bias statistics.....                                                    | 20                                   |

## Study Selection

**Figure S1:** Flow diagram of circulating study search and inclusion.

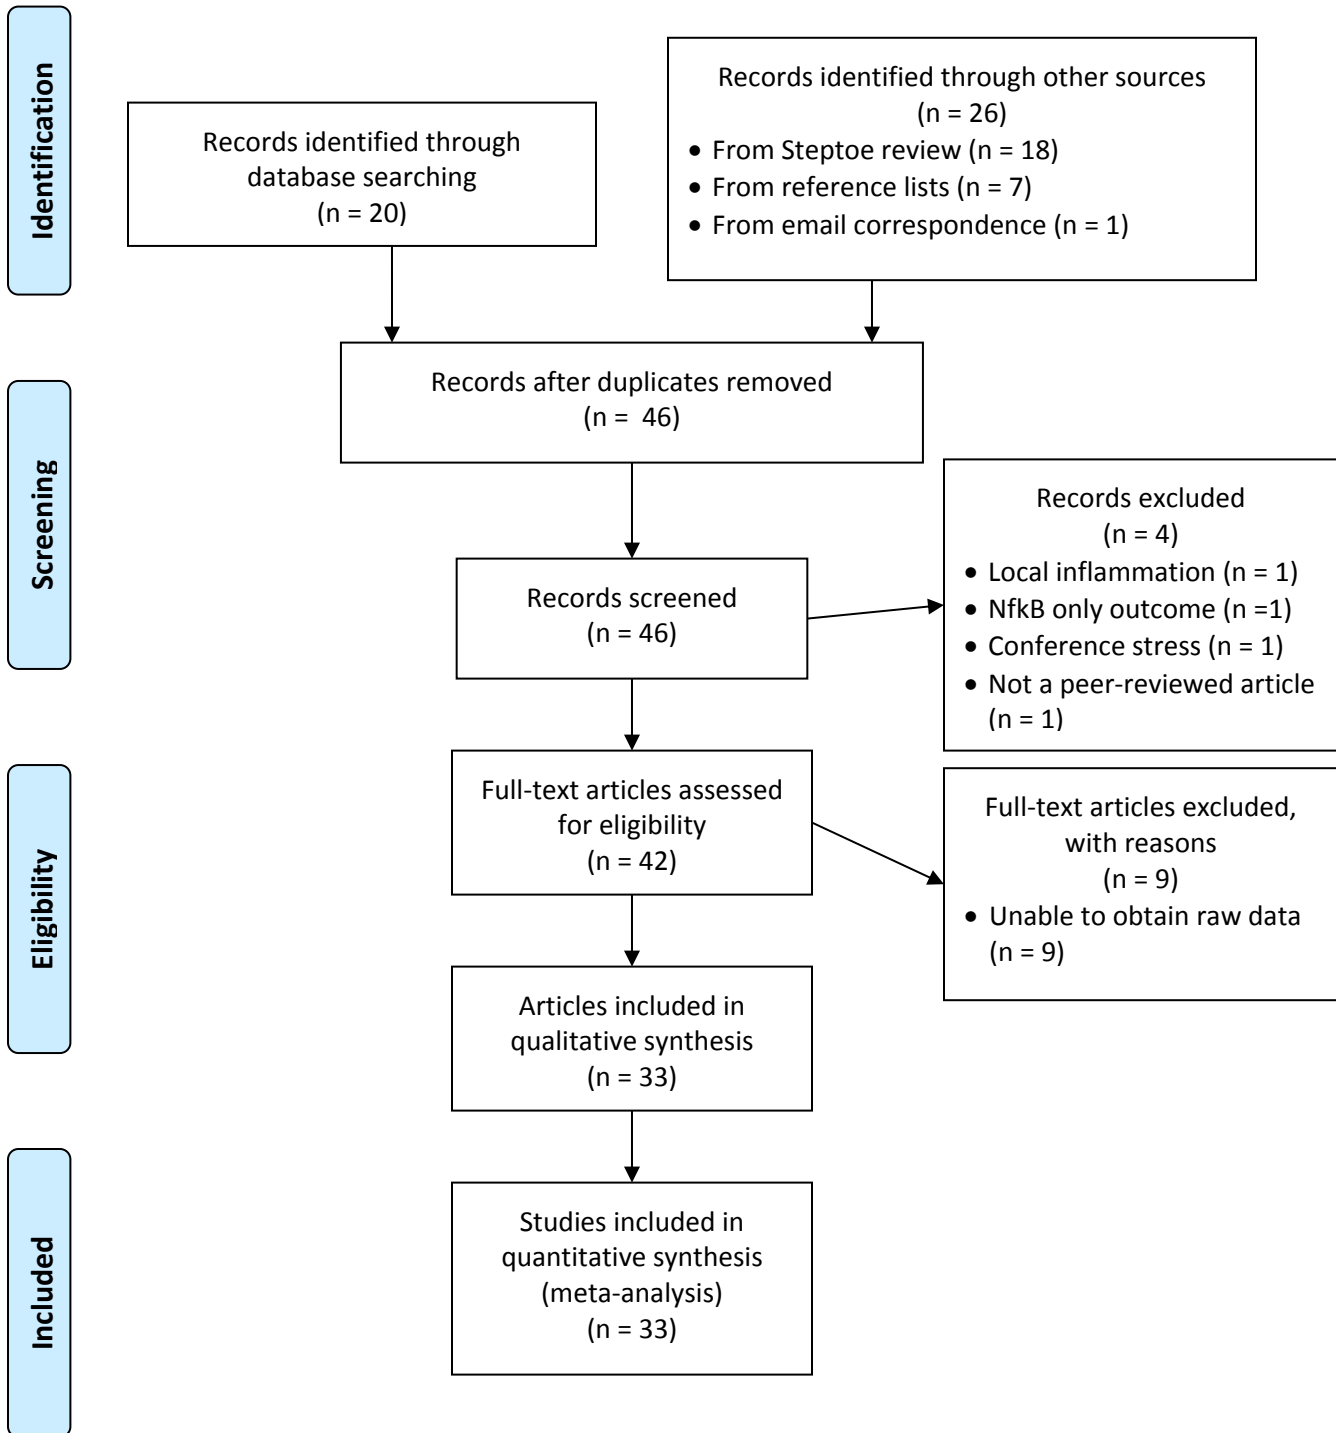

**Figure S2:** Flow of diagram of stimulated study search and inclusion.

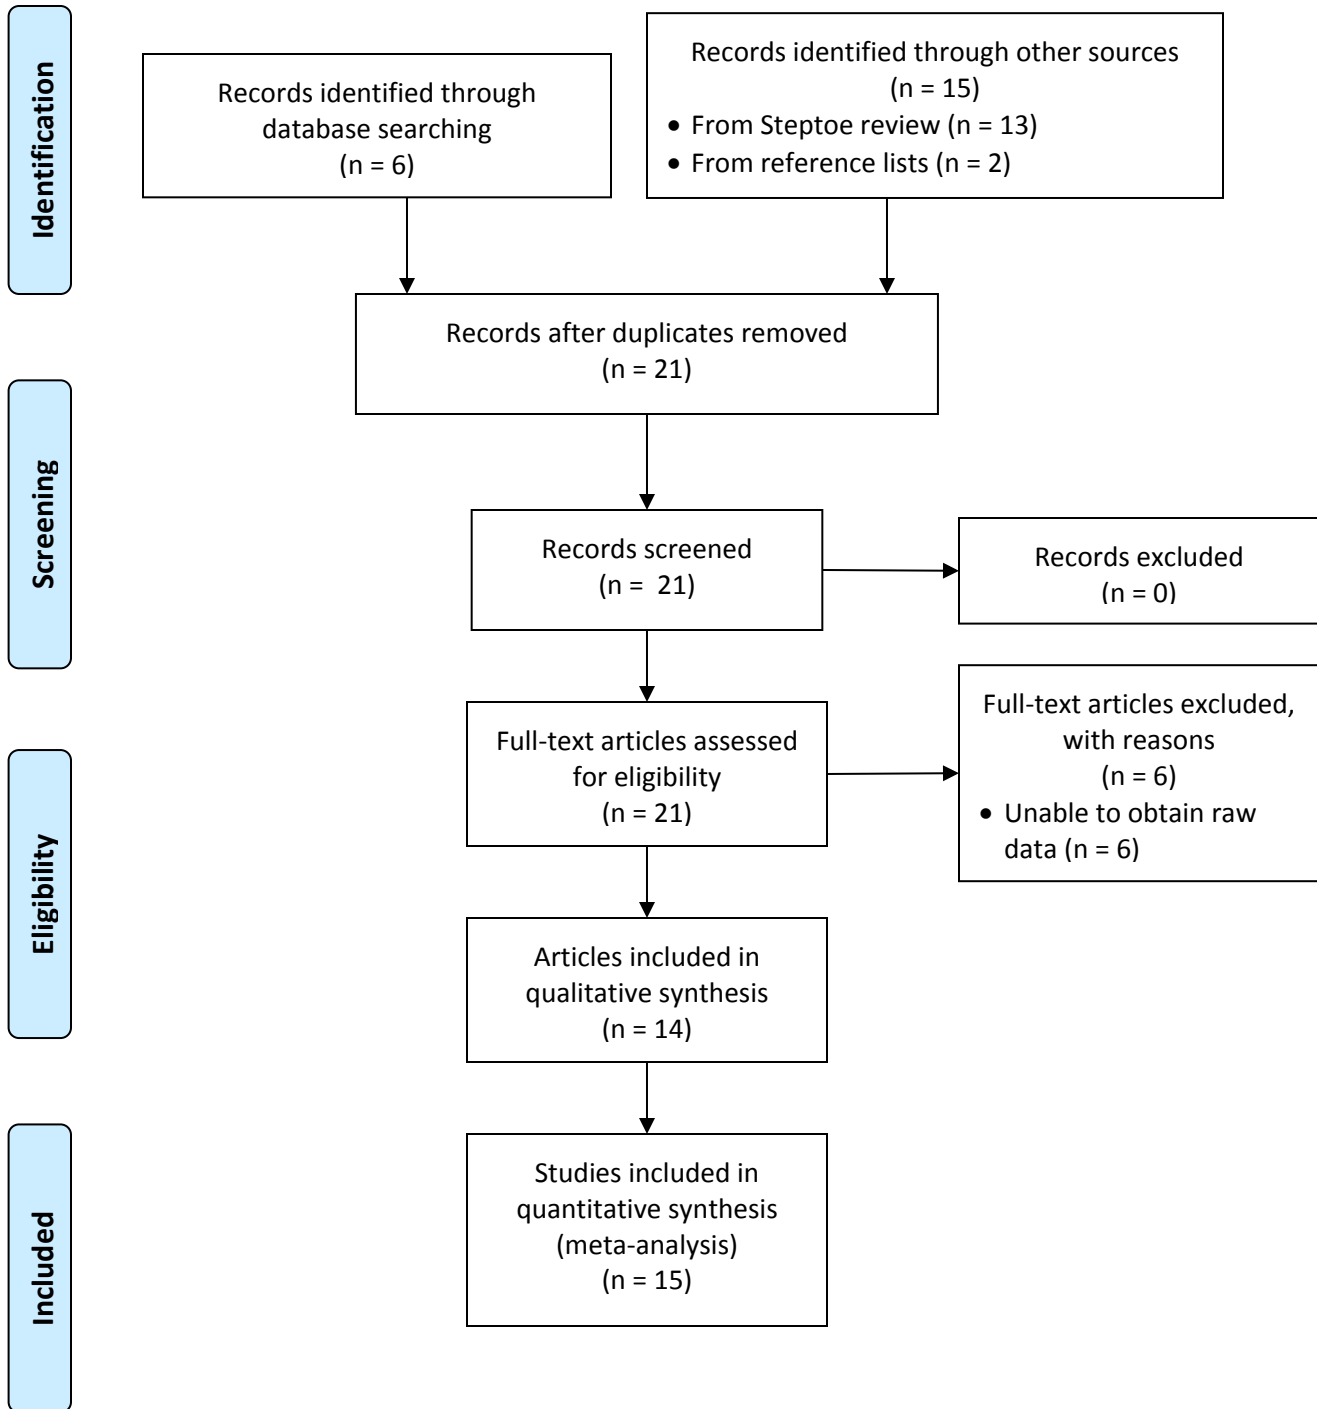

## Included Studies

**Table S1:** Summary of studies measuring circulating inflammatory markers

| Study                   | N   | Health Status                                           | Age ( <i>M</i> ) | % Male | Stressor             | Marker                                                                                 | Time-points |
|-------------------------|-----|---------------------------------------------------------|------------------|--------|----------------------|----------------------------------------------------------------------------------------|-------------|
| Altemus et al., 2001*   | 46  | Healthy                                                 |                  | 0      | TSST                 | IL-1 $\beta$ , IL-10, TNF- $\alpha$                                                    | 10, 40      |
| Aschbacher et al., 2012 | 35  | Healthy                                                 | 61               | 0      | TSST                 | IL-1 $\beta$ , IL-6                                                                    | 50          |
| Bennett et al., 2013    | 89  | Breast cancer survivors                                 | 51               | 0      | TSST                 | IL-6                                                                                   | 45, 120     |
| Breines et al., 2014    | 41  | Healthy                                                 | 21               | 56     | TSST                 | IL-6                                                                                   | 30, 120     |
| Brydon et al., 2008     | 67  | Healthy                                                 | 21               | 0      | Stroop, Speech       | IL-1RA, IL-6                                                                           | 0, 45       |
| Brydon et al., 2005*    | 153 | Healthy                                                 | 52               | 56     | Stroop, Mirror Trace | IL-6, fibrinogen                                                                       | 30, 75, 120 |
| Carroll et al., 2011    | 102 | Healthy                                                 | 50               | 40     | TSST                 | IL-6                                                                                   | 30          |
| Christian et al., 2013  | 39  | Healthy                                                 | 24               | 0      | TSST                 | IL-6                                                                                   | 45          |
| de Brouwer et al., 2013 | 71  | Rheumatoid arthritis                                    | 57               | 43     | TSST                 | IL-1 $\beta$ , IL-2, IL-4, IL-5, IL-6, IL-7, IL-8, IL-10, IFN $\gamma$ , TNF- $\alpha$ | 20, 40, 80  |
| de Brouwer et al., 2014 | 80  | Rheumatoid arthritis (32), Psoriasis (23), Healthy (25) | 58               | 60     | TSST                 | IL-1 $\beta$ , IL-2, IL-4, IL-5, IL-6, IL-7, IL-8, IL-10, IFN $\gamma$ , TNF- $\alpha$ | 20, 40, 80  |
| Derry et al. 2013       | 138 | Healthy                                                 | 51               | 33     | TSST                 | IL-6                                                                                   | 45          |

|                          |     |                                               |    |      |                                     |                                         |                        |
|--------------------------|-----|-----------------------------------------------|----|------|-------------------------------------|-----------------------------------------|------------------------|
| Dugue et al., 1993*      | 7   | Healthy                                       | 18 | 100  | Stroop                              | CRP, IL-1 $\beta$ , IL-6, TNF- $\alpha$ | 0                      |
| Edwards et al., 2006*    | 40  | Healthy                                       | 21 | 50   | Mental Arithmetic                   | IL-6                                    | 1, 30, 60              |
| Fagundes et al., 2013    | 138 | Healthy                                       | 51 | 33   | TSST                                | IL-6                                    | 45, 120                |
| Hackett et al., 2012     | 524 | Healthy                                       | 63 | 54   | Stroop, Mirror Trace                | IL-1RA, IL-6                            | 1, 45                  |
| Hamer & Steptoe 2007     | 207 | Healthy                                       | 52 | 53.6 | Stroop, Mirror Trace                | IL-1RA, IL-6, TNF- $\alpha$             | 45                     |
| Hamer et al., 2006*      | 92  | Healthy                                       | 33 | 100  | Speech, Mirror Trace                | CRP                                     | 10                     |
| Heesen et al., 2002*     | 50  | Multiple Sclerosis (35),<br>Healthy (15)      | 35 | 40   | Mental Arithmetic<br>Stroop, Speech | IL-6, sIL-6r, TNF- $\alpha$             | 1, 60                  |
| Heffner et al., 2012     | 83  | Healthy                                       | 61 | 46   | Auditory Challenge                  | IL-6                                    | 60                     |
| Kop et al., 2008         | 64  | Coronary artery disease (36),<br>Healthy (28) | 57 | 66   | Anger Recall,<br>Mental Arithmetic  | CRP, IL-6                               | 1, 30                  |
| Kuebler et al., 2015     | 25  | Healthy                                       | 36 | 100  | TSST                                | IL-1 $\beta$ , IL-6, IL-10              | 10, 20, 60,<br>90, 120 |
| Lutgendorf et al., 2004* | 14  | Healthy                                       | 34 | 50   | Stroop                              | IL-6                                    | 10, 15, 30, 60         |
| Miller et al., 2005*     | 72  | Depressed (36), Healthy (36)                  | 27 | 0    | Speech, Puzzle                      | CRP, IL-6, TNF- $\alpha$                | 1, 30                  |
| Muscatell et al., 2015   | 31  | Healthy                                       | 19 | 0    | Social Rejection                    | IL-6, TNF- $\alpha$                     | 30, 60, 90             |
| Owen & Steptoe, 2003*    | 211 | Healthy                                       | 52 | 56   | Stroop, Mirror Trace                | IL-6, TNF- $\alpha$                     | 45                     |
| Pace et al., 2006        | 28  | Depressed (14), Healthy (14)                  | 29 | 100  | TSST                                | IL-6                                    | 30, 60, 75, 90         |

|                        |    |                              |    |     |                                          |                                                    |                |
|------------------------|----|------------------------------|----|-----|------------------------------------------|----------------------------------------------------|----------------|
| Pace et al., 2009      | 61 | Healthy                      | 19 | 50  | TSST                                     | IL-6                                               | 30, 60, 75, 91 |
| Puterman et al., 2013  | 48 | Healthy                      | 63 | 0   | TSST                                     | IL-6                                               | 30, 50, 90     |
| Rohleder et al., 2006* | 12 | Healthy                      | 27 | 100 | TSST                                     | IL-1RA                                             | 1, 20, 45, 90  |
| Step toe et al., 2001* | 12 | Healthy                      | 41 | 46  | Stroop,<br>Mirror Trace                  | CRP, IL-1RA, IL-6,<br>TNF- $\alpha$                | 45, 120        |
| Weick et al., 2014     | 28 | Bipolar (13), Healthy (15)   | 47 | 0   | TSST                                     | IL-2, IL-6, TNF- $\alpha$                          | 40             |
| Weinstein et al., 2010 | 28 | Depressed (14), Healthy (14) | 40 | 50  | Frustration Recall,<br>Mental Arithmetic | CRP, IL-6, TNF- $\alpha$                           | 1, 30          |
| Yamakawa et al., 2009  | 16 | Healthy                      | 21 | 100 | TSST                                     | IL-2, IL-6, IL-12, IFN $\gamma$ ,<br>TNF- $\alpha$ | 1, 30, 60, 90  |

---

*Notes:* All times refer to minutes post-stress task; TSST = Trier Social Stress Test; IL = interleukin; CRP = C-reactive protein; TNF = tumor necrosis factor; IFN = interferon; ra = receptor antagonist

\* study included in Steptoe et al. (2007) review

**Table S2:** Summary of studies measuring stimulated inflammatory markers.

| Study                      | N   | Health Status                                        | Age ( <i>M</i> ) | % Male | Stressor             | Marker                                                   | Time-points  | Stimulant<br>(Concentration,<br>Incubation Time)                                 |
|----------------------------|-----|------------------------------------------------------|------------------|--------|----------------------|----------------------------------------------------------|--------------|----------------------------------------------------------------------------------|
| Ackerman et al. 1998*      | 50  | Multiple Sclerosis (25),<br>Healthy (25)             | 37               | 28     | TSST                 | IL-1 $\beta$ , IL-4, IFN $\gamma$ ,<br>TNF- $\alpha$     | 1, 5, 20, 60 | LPS (5ug/mL, 48hr) <sup>a</sup><br>PHA (5ug/mL, 48hr) <sup>a</sup>               |
| Bellingrath et al., 2010   | 55  | Healthy                                              | 50               | 38     | TSST                 | IL-2, IL-4, IL-6,<br>IL-10, IFN $\gamma$ , TNF- $\alpha$ | 1            | PHA (.5mg/mL, 22hr) <sup>b</sup>                                                 |
| Bower et al., 2007*        | 25  | Breast Cancer Survivors                              | 58               | 0      | TSST                 | IL-1 $\beta$ , IL-6, TNF- $\alpha$                       | 30           | LPS (100pg/mL, 20hr) <sup>a</sup>                                                |
| Buske-Kirschbaum,<br>2007* | 48  | Psoriasis (23), Healthy (25)                         | 30               | 48     | TSST                 | IL-2, IL-4, IL-10,<br>IFN $\gamma$ ,                     | 1, 10, 60    | PHA (5ug/mL, 48hr) <sup>b</sup>                                                  |
| Dickerson et al., 2009     | 39  | Healthy                                              | 21               | 0      | TSST                 | TNF- $\alpha$                                            | 1, 40        | LPS (100pg/mL, 20hr) <sup>a</sup>                                                |
| Gaab et al., 2005*         | 41  | Chronic Fatigue (21),<br>Healthy (20)                | 36               | 52     | TSST                 | IL-6, TNF- $\alpha$                                      | 10, 60       | LPS (30ng/mL, 18hr) <sup>a</sup>                                                 |
| Jacobs et al., 2001*       | 31  | Rheumatoid Arthritis (9),<br>Lupus (7), Healthy (15) | 41               | 0      | Speech               | IL-2, IL-6, IL-10                                        | 60           | LPS (not specified, 36hr) <sup>a</sup><br>PHA (not specified, 24hr) <sup>a</sup> |
| Jaremka et al., 2013a      | 134 | Healthy                                              | 51               | 31     | TSST                 | IL-6, TNF- $\alpha$                                      | 45, 120      | LPS (1ug/mL, 24hr) <sup>b</sup>                                                  |
| Jaremka et al., 2013b      | 144 | Breast Cancer Survivors                              | 51               | 0      | TSST                 | IL-1 $\beta$ , IL-6, TNF- $\alpha$                       | 45, 121      | LPS (1ug/mL, 24hr) <sup>b</sup>                                                  |
| Miller et al., 2005*       | 72  | Depressed (36), Healthy (36)                         | 27               | 0      | Speech,<br>Puzzle    | IL-6, TNF- $\alpha$                                      | 1, 30        | LPS (100ng/mL, 6hr) <sup>a</sup>                                                 |
| Peters et al., 1999*       | 96  | Healthy                                              | 22               | 100    | Mental<br>Arithmetic | IL-6                                                     | 1, 15, 30    | LPS (10, 1, .1, .001ng/mL,<br>18hr) <sup>a</sup>                                 |
| Prather et al., 2009       | 61  | Healthy                                              | 50               | 46     | TSST                 | IL-1 $\beta$ , IL-6, TNF- $\alpha$                       | 1, 30        | LPS (2.5ug/mL, 24hr) <sup>a</sup>                                                |
| Rohleder et al., 2003*     | 25  | Healthy                                              | 24               | 0      | TSST                 | IL-6                                                     | 10, 60       | LPS (18hr, 30ng/mL) <sup>a</sup>                                                 |

|                    |    |         |    |     |      |                     |           |                                  |
|--------------------|----|---------|----|-----|------|---------------------|-----------|----------------------------------|
| Wirtz et al., 2007 | 44 | Healthy | 43 | 100 | TSST | IL-6, TNF- $\alpha$ | 1, 20, 60 | LPS (15ng/mL, 18hr) <sup>a</sup> |
| Wolf et al., 2009  | 29 | Healthy | 36 | 41  | TSST | IL-6                | 10, 60    | LPS (30ng/mL, 18hr) <sup>a</sup> |

---

*Notes:* All time-points refer to minutes post-stress task. Methods used to stimulate immune markers varied considerably. TSST = Trier Social Stress Test; IL = interleukin; CRP = C-reactive protein; TNF = tumor necrosis factor; IFN = interferon; ra = receptor antagonist; LPS = lipopolysaccharide; PHA = phytohaemagglutinin  
<sup>a</sup> whole blood incubation; <sup>b</sup> peripheral blood mononuclear cell incubation  
\* study included in Steptoe et al. (2007) review



**Table S3.**

Assays used to assess circulating levels of interleukin-6

| Study                   | Quantification method            | Company                | Sensitivity | Intra-Assay CV (%) | Inter-assay CV (%) |
|-------------------------|----------------------------------|------------------------|-------------|--------------------|--------------------|
| Aschbacher et al., 2013 | ELISA                            | Meso Scale Discovery   | .07         | 3                  | 4                  |
| Bennett et al., 2013    | ELISA                            | R&D Systems (HS)       | .039        | 6.9-7.8            | 6.5-9.6            |
| Breines et al., 2014    | ELISA                            | R&D Systems (HS)       | .09         | 5.3                | 9.2                |
| Brydon et al., 2008     | ELISA                            | R&D Systems (HS)       | .09         | 5.3                | 9.2                |
| Brydon et al., 2005     | ELISA                            | R&D systems (HS)       |             |                    |                    |
| Carroll et al., 2011    | ELISA                            | R&D Systems (HS)       | .09         | 5                  | 7                  |
| Christian et al., 2013  | Multiplex Cytokine multiple kits | Meso Scale Discovery   | .025        | 4.3                | 5.2                |
| de Brouwer et al., 2013 | Cytokine multiple kits           | Invitrogen Corporation | <5          |                    |                    |
| de Brouwer et al., 2014 | Cytokine multiple kits           | Invitrogen Corporation |             |                    |                    |
| Derry et al. 2013       | Multispot cytokine kits          | Mesoscale Discovery    | .26         | 5.64-6.7           | 5.16-10.2          |
| Dugue et al., 1993      | Radio-immun assay                |                        |             |                    |                    |

|                         |                           |                          |           |          |           |
|-------------------------|---------------------------|--------------------------|-----------|----------|-----------|
| Edwards et al., 2006    | ELISA                     | Diaclone Research (HS)   |           | 5.5      | 1.4       |
| Fagundes et al., 2013   | Multipot<br>cytokine kits | Mesoscale Discovery      | .26       | 5.64-6.7 | 5.16-10.2 |
| Hackett et al., 2012    | ELISA                     | R&D Systems (HS)         | .016-.110 | 7.3      | 7.7       |
| Hamer & Steptoe 2007    | ELISA                     | R&D Systems (HS)         | .09       | 5.3      | 9.2       |
| Heesen et al., 2002     | ELISA                     | R&D Systems              |           |          |           |
| Heffner et al., 2012    | ELISA                     | R&D Systems (HS)         |           | <10      | <10       |
| Kop et al., 2008        | ELISA                     | R&D Systems              |           | 5.0-8.6  | 5.0-8.6   |
| Kuebler et al., 2015    | ELISA                     | Mesoscale discovery (HS) | .117      | 4.5      | 7.3       |
| Lutgendorf et al., 2004 | ELISA                     | R&D Systems (HS)         | .10       |          | 7         |
| Miller et al., 2005     | ELISA                     | R&D Systems (HS)         | .7        | 4.6      |           |
| Muscatell et al., 2015  | ELISA                     | R&D Systems (HS)         |           | <9       | <9        |
| Owen & Steptoe, 2003    | ELISA                     | R&D Systems (HS)         | .09       | 5.3      | 9.2       |
| Pace et al., 2006       | ELISA                     | R&D Systems              |           |          |           |
| Pace et al., 2009       | ELISA                     | R&D Systems              |           | 10       | 6         |
| Puterman et al., 2013   | immunoassay               | Mesoscale Discovery      | .46       | 4        | 6         |

|                        |                        |                   |           |        |          |
|------------------------|------------------------|-------------------|-----------|--------|----------|
| Steptoe et al., 2001   | ELISA                  | R&D Systems(HS)   | .09       | 5.3    | 9.2      |
| Weick et al., 2014     | Cytokine<br>bead array | BD biosciences    |           |        |          |
| Weinstein et al., 2010 | ELISA                  | R&D Systems (HS)  | .156-10.0 | 6.3    |          |
| Yamakawa et al., 2009  | Flowcytomix<br>Assay   | Bender Medsystems | 1.2       | 4.5-12 | 3.3-16.3 |

---

## Results of Meta-Regression

**Figure S3:** Meta-regression with age regressed onto effect size for acute stress on IL-6

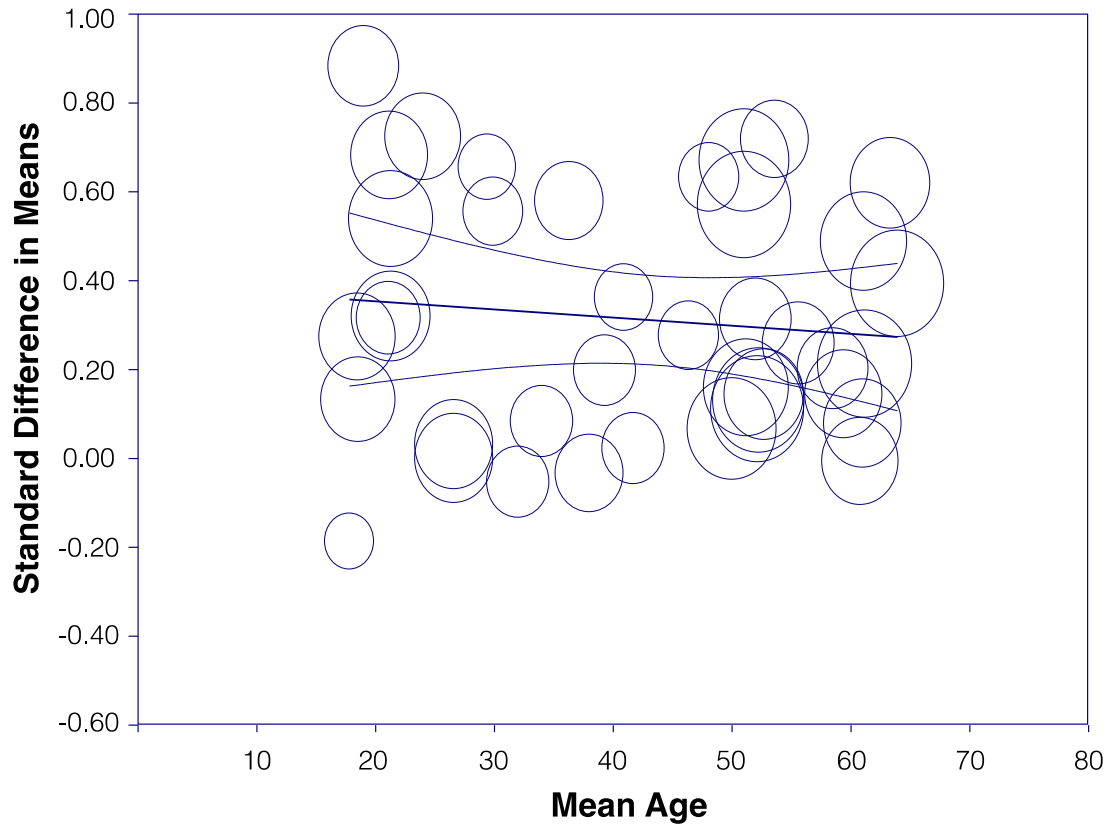

**Figure S4:** Meta-regression with sex regressed onto effect size for acute stress on IL-6

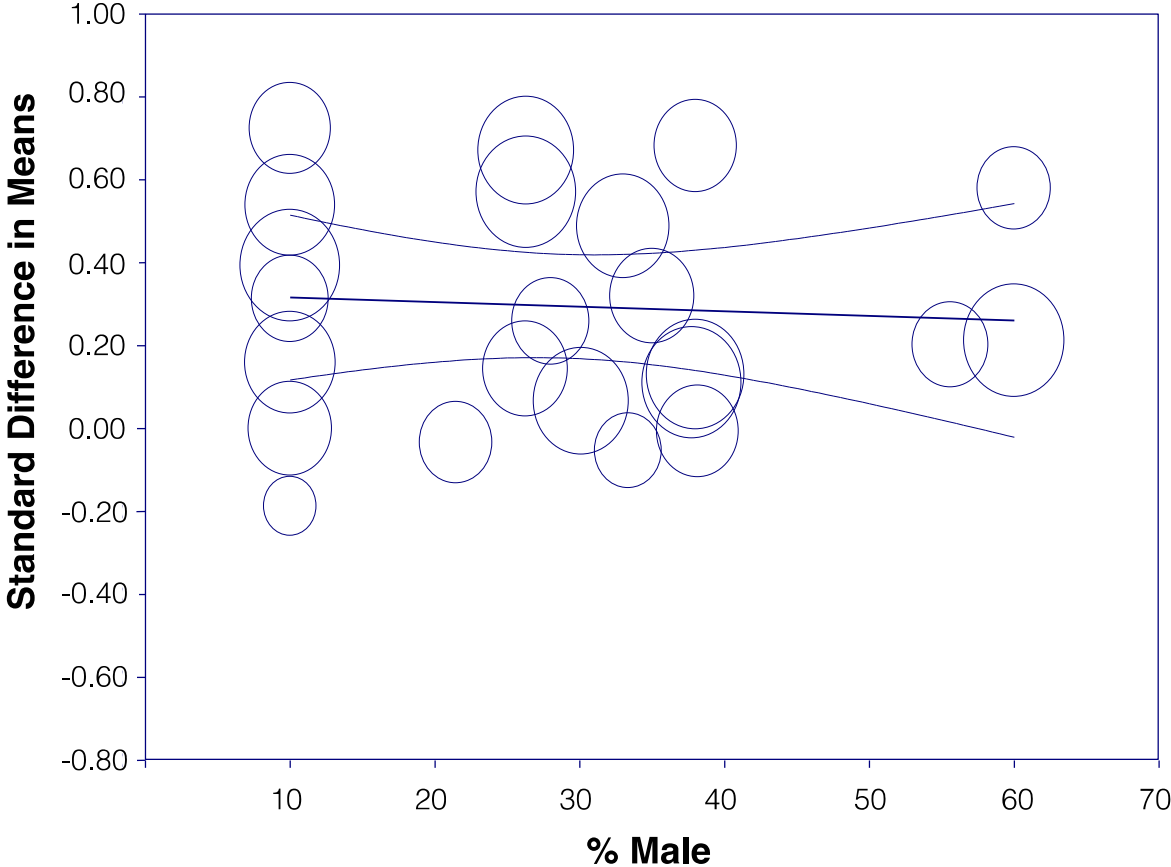

## Identified Moderators

**Table S4:** Moderators of circulating inflammatory response

| Moderator                               | Study                      | Sig? | Cytokine(s) affected, Time Point(s), Control Condition(s)                                                                                                                                                                                                        | Statistical Controls                                                                                                                                                                           |
|-----------------------------------------|----------------------------|------|------------------------------------------------------------------------------------------------------------------------------------------------------------------------------------------------------------------------------------------------------------------|------------------------------------------------------------------------------------------------------------------------------------------------------------------------------------------------|
| Cigarette smoking history               | Bennett et al., 2013       | y    | Exaggerated IL-6 response at 2 hours in breast cancer survivors who were former smokers compared to those who had never smoked                                                                                                                                   | age, BMI, time since cancer treatment, education, anti-depressant use                                                                                                                          |
| Abdominal obesity (waist circumference) | Brydon et al., 2008        | y    | Higher IL-1ra response at 45 min in individuals in highest tertile waist circumference (> 70cm) compared to individuals in the lower two tertiles (< 70cm)                                                                                                       | age, ethnicity, smoking status, baseline levels of cytokines                                                                                                                                   |
| African-American race                   | Christian et al., 2013     | y    | Higher IL-6 response at 2 hours in African Americans compared to Whites                                                                                                                                                                                          | baseline IL-6; groups not different in age, education status, income, nulliparity, BMI                                                                                                         |
| Pregnancy                               | Christian et al., 2013     | n    | Tendency towards higher IL-6 response at 2 hours in pregnant compared to non-pregnant women                                                                                                                                                                      | baseline IL-6; groups not different in age, education status, income, nulliparity, BMI                                                                                                         |
| Physical fitness (exercise heart rate)  | Hamer & Steptoe, 2007      | y    | Those in high fitness group (lowest exercise HR tertile) had smaller IL-6, TNF- $\alpha$ response at 45 min compared to those in the lowest fitness group (highest HR tertile)                                                                                   | age, sex, BMI, smoking, alcohol, SES, basal levels of inflammatory markers                                                                                                                     |
| Cortisol response                       | Kunz-Ebrechet et al., 2003 | y    | Individuals with the lowest cortisol response to stress (lowest 40% of sample = cortisol non-responders) showed greater IL-6, IL-1ra response at 45 min compared to individuals with the highest cortisol response (highest 40% of sample = cortisol responders) | IL-6: age, sex, BMI, waist/hip ratio, change in hematocrit, method of blood sampling; IL-1ra: sex, BMI, waist/hip ratio, change in hematocrit, time of day, use of hormone replacement therapy |
| Norepinephrine response                 | Kop et al, 2008            | y    | Highest norepinephrine responses (above median split) were related to greater IL-6, CRP response at 29 min compared to lowest norepinephrine responses (below median split)                                                                                      | age, BMI                                                                                                                                                                                       |

|                                 |                         |   |                                                                                                                                                                           |                                                                                             |
|---------------------------------|-------------------------|---|---------------------------------------------------------------------------------------------------------------------------------------------------------------------------|---------------------------------------------------------------------------------------------|
| Positive outlook                | Aschbacher et al., 2012 | y | Decreased positive outlook during the task associated with higher IL-1 $\beta$ response from pre- to 50 min (no comparison group)                                         | age, BMI, caregiver status, anti-depressant use, baseline cytokine levels                   |
| Self-compassion                 | Breines et al., 2014    | y | Higher self-compassion associated with lower IL-6 response at 120 min (no comparison group)                                                                               | age, sex, ethnicity, BMI, self-esteem, depressive symptoms, post-TSST distress, TSST timing |
| Affective response to task      | Carroll et al., 2011    | y | Angry/anxious responses to stress task associated with increased IL-6 response at 30 min (no comparison group)                                                            | sex, age, race, BMI, and menopausal status                                                  |
| Anger, perceived social support | Puterman et al., 2013   | y | Anger measured 10 min after stress task predicted increased rate of change in IL-6 through 90 min (no comparison group); effect larger for those with low social support. | age, BMI, caregiver status                                                                  |
| Loneliness                      | Hackett et al., 2012    | y | Greater loneliness (highest tertile) associated with greater IL-6, IL-1ra response in women at 45 min, compared to the lowest tertile of loneliness                       | age, grade of employment, BMI, smoking status                                               |
| Effort-reward balance           | Hamer et al., 2006      | y | Men in the highest tertile of effort-reward imbalance showed greater CRP response to stress task at 10 min, compared to men in the lowest tertile                         | age, BMI, baseline levels of CRP                                                            |
| Sleep quality                   | Heffner et al., 2012    | y | Poor sleep quality on the PSQI (PSQI > 5) had larger IL-6 responses at 60 min, compared to good sleepers (PSQI $\leq$ 5)                                                  | age, BMI, depressive symptoms, perceived stress, loneliness                                 |
| Subjective social status (SSS)  | Derry et al., 2013      | y | Individuals reporting lower SSS showed higher IL-6 response at 45 min and 2 hours compared to those with higher SSS (no comparison group)                                 | age, sex, BMI, visit, Omega-3 supplementation group                                         |
| SES (employment grade)          | Steptoe et al., 2002    | n | No relationship between employment grade (high, intermediate, low) and change in TNF-a, IL-1ra, IL-6                                                                      | SES groups did not differ in age, sex, BMI, waist/hip, time of day                          |

|                                |                         |   |                                                                                                                                                                                                                                                                                           |                                                                                               |
|--------------------------------|-------------------------|---|-------------------------------------------------------------------------------------------------------------------------------------------------------------------------------------------------------------------------------------------------------------------------------------------|-----------------------------------------------------------------------------------------------|
| Stress management training     | de Brouwer et al., 2013 | y | Among patients with rheumatoid arthritis, stress management training associated with lower IL-8 response at 9-week follow-up (baseline through 80min) compared to control group, no difference in IL-6, IL-1 $\beta$ , IL-2, IL-4, IL-5, IL-6, IL-7, IL-10, IFN- $\gamma$ , TNF- $\alpha$ | sex, hormonal contraceptive use, baseline anxiety, nonsteroidal anti-inflammatory drug use    |
| Compassion meditation training | Pace et al., 2009       | n | Participation in 6 weeks of compassion meditation training did not change IL-6 reactivity when compared to a health discussion group; practice time in the intervention group associated with decreased IL-6                                                                              | baseline cytokine level, time of day; groups not different on age, sex, BMI, depression score |

*Notes:* all times refer to post-stress task; BMI = body mass index; CTQ = Childhood Trauma Questionnaire; SES = Socioeconomic Status; MDD = major depressive disorder; PSQI = Pittsburgh Sleep Quality Questionnaire; IL = interleukin; TNF = tumor necrosis factor; IFN = interferon; ra = receptor antagonist

**Table S5:** Moderators of stimulated inflammatory response

| Moderator              | Study                 | Sig? | Cytokine(s) affected, Time Point(s), Control Condition(s)                                                                                                          | Statistical Controls                                                                                                           |
|------------------------|-----------------------|------|--------------------------------------------------------------------------------------------------------------------------------------------------------------------|--------------------------------------------------------------------------------------------------------------------------------|
| BMI                    | Huang et al., 2011    | y    | BMI positively correlated with % change in LPS-stimulated IL-6, not TNF- $\alpha$ , immediately following the stressor (no comparison group)                       | none                                                                                                                           |
| Menopause              | Prather et al., 2009  | y    | Post-menopausal women had greater IL-6 response compared to men immediately post task & at 30 min, and greater TNF- $\alpha$ response at post-task, but not 30 min | groups matched in age, race, BMI, or baseline levels of stimulated cytokine, cytokine values were corrected for number of WBCs |
| Oral contraceptive use | Rohleder et al., 2003 | y    | Women using oral contraception showed exaggerated IL-6 responses at 60min compared to women in the luteal phase                                                    | cytokine levels corrected for monocyte number in sample                                                                        |
| IR (HOMA)              | Suarez et al., 2006   | y    | Higher HOMA-IR associated with greater stress-induced increases in IL-1 $\beta$ , TNF- $\alpha$ at 15 min (no comparison group)                                    | age, BMI, race/ethnicity                                                                                                       |



|                                                                |                          |   |                                                                                                                                                                                                                                                                                                                                               |                                                                                                                 |
|----------------------------------------------------------------|--------------------------|---|-----------------------------------------------------------------------------------------------------------------------------------------------------------------------------------------------------------------------------------------------------------------------------------------------------------------------------------------------|-----------------------------------------------------------------------------------------------------------------|
| Loneliness                                                     | Jaremka et al., 2013a    | y | Among healthy, sedentary, overweight individuals, loneliness associated with greater increases in production of IL-6, TNF- $\alpha$ at 45 min and 2 hours (no comparison group)                                                                                                                                                               | age, sex, abdominal diameter, baseline levels of cytokine                                                       |
| Loneliness                                                     | Jaremka et al., 2013b    | y | Among breast cancer survivors, loneliness associated with greater increases in production of IL-6, IL-1 $\beta$ at 45 min and 2 hours (no comparison group)                                                                                                                                                                                   | age, abdominal diameter, baseline levels of cytokine                                                            |
| Negative affect                                                | Suarez et al., 2006      | y | Among men with higher HOMA-IR (above median), negative affect associated positively with stimulated secretion of TNF- $\alpha$ , IL-6 at 15 min (no comparison group); among men with lower HOMA-IR (below median), greater negative affect associated inversely with TNF- $\alpha$ , IL-6 secretion at 15 min (no comparison group)          | age, BMI, race/ethnicity                                                                                        |
| Primary Appraisal<br>Secondary Appraisal<br>(PASA) scale score | Wirtz et al., 2007       | y | Higher PASA "stress index" associated with greater stimulated TNF- $\alpha$ , IL-6 production (AUC through 60min); higher PASA subscale "control expectancy" associated with lower TNF- $\alpha$ , IL-6 production (AUC through 60min); greater PASA subscale "challenge" associated with higher IL-6 production (AUC through 60min)          | age, BMI, mean arterial pressure                                                                                |
| Effort-reward imbalance (ERI) and over commitment (OC)         | Bellingrath et al., 2010 | y | Higher ERI associated with greater decrease in stimulated IL-10, greater increase in stimulated TNF- $\alpha$ /IL-10 ratio immediately post-stress (1min) (no comparison group, ERI continuous); higher scores for OC associated with greater stimulated IL-2 production immediately post-stress (1 min) (no comparison group, OC continuous) | age, depressive symptoms, sex, group variable (men, premenopausal women in luteal phase, post-menopausal women) |
| Effort & controllability of task                               | Peters et al., 1999      | y | Low control condition associated with decreased production of IL-6 at 15 and 30 min compared to the high control condition                                                                                                                                                                                                                    | subjects were randomized to condition                                                                           |

|                        |                    |   |                                                                                                                                                                                                                                              |                                        |
|------------------------|--------------------|---|----------------------------------------------------------------------------------------------------------------------------------------------------------------------------------------------------------------------------------------------|----------------------------------------|
| Cancer-related fatigue | Bower et al., 2007 | y | Breast cancer survivors with persistent fatigue (SF-36 vitality scale < 50) showed greater stimulated production of IL-1 $\beta$ , IL-6 at 30 min compared to breast cancer survivors without persistent fatigue (SF-36 vitality scale > 70) | age, marital status, BMI, caffeine use |
|------------------------|--------------------|---|----------------------------------------------------------------------------------------------------------------------------------------------------------------------------------------------------------------------------------------------|----------------------------------------|

---

*Notes:* All times refer to post-stress task; BMI = body mass index; IR = insulin resistance; HOMA = homeostatic model assessment, a measure of IR; LPS = lipopolysaccharide; WBCs = white blood cells; SF-36 = 36-item short form survey from the Medical Outcomes Study; IL = interleukin; TNF = tumor necrosis factor

## Publication Bias Results

Figure S5. Funnel plots of standard error by standard difference in means

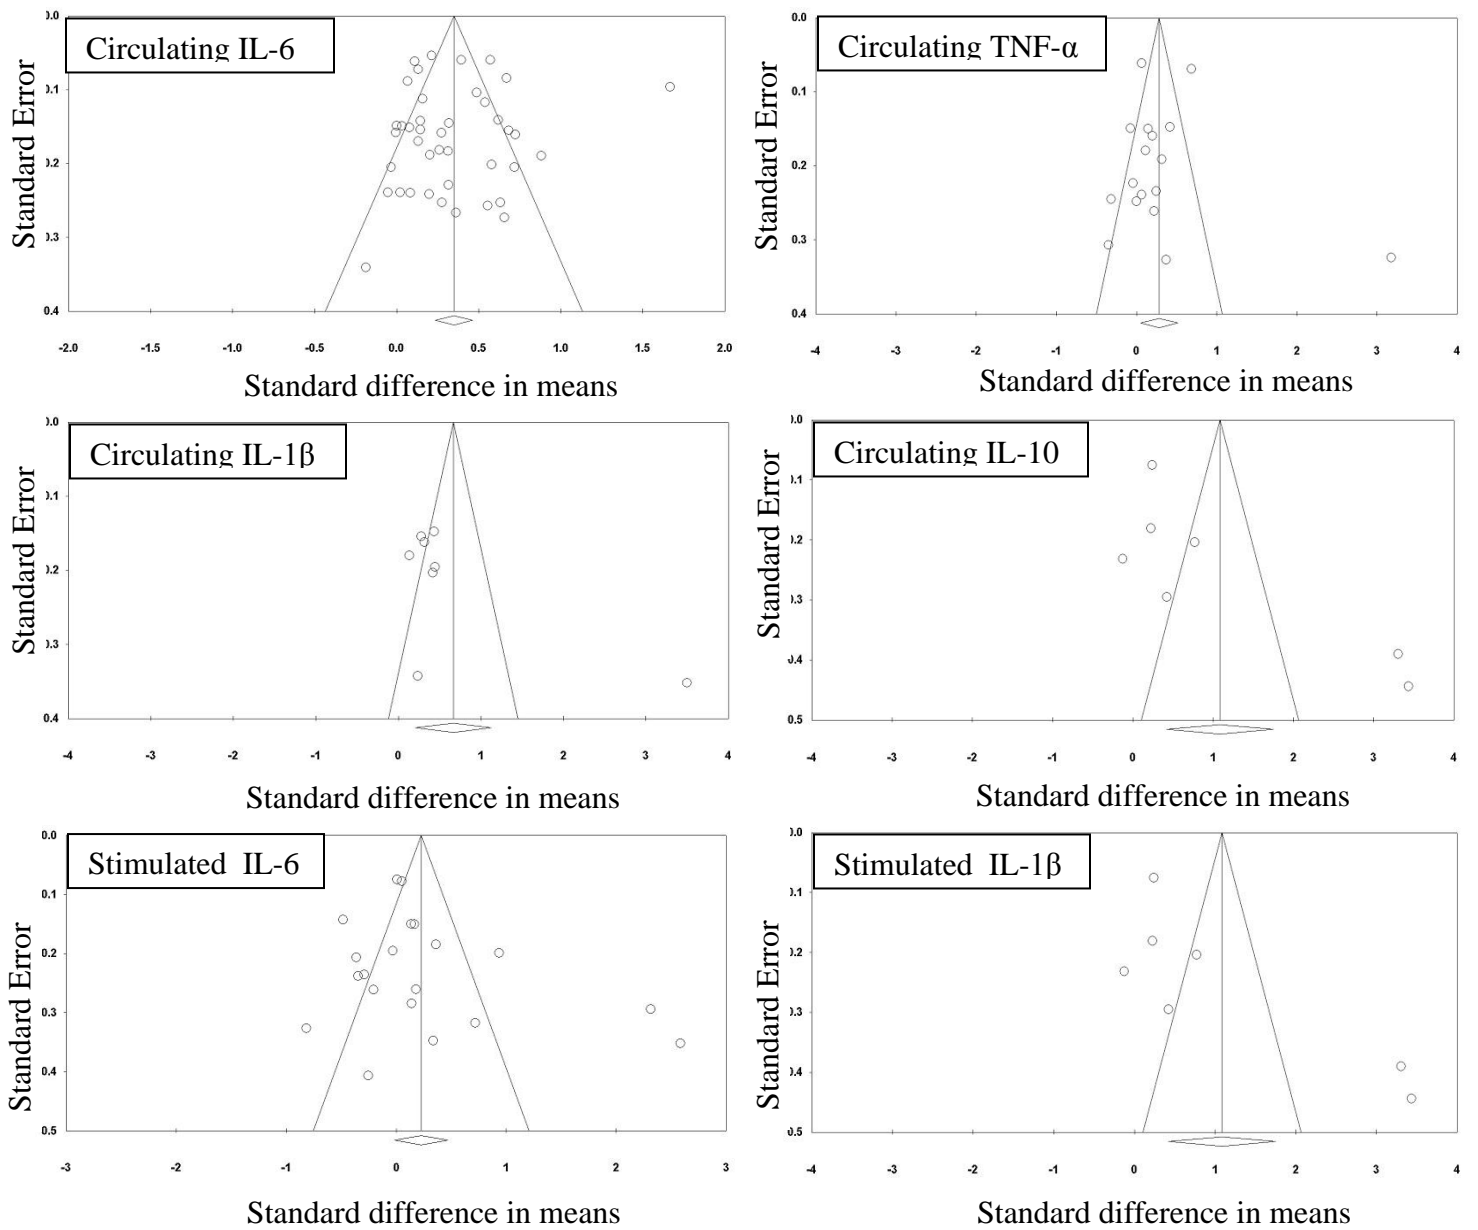

**Table S6:** Publication bias statistics

| Cytokines (minutes post stress)         | Number of samples | Fail-Safe N | Eggers Regression Intercept |
|-----------------------------------------|-------------------|-------------|-----------------------------|
| Circulating IL-6 (11-120min)            | 40                | 2076        | -0.03                       |
| Circulating IL-1 $\beta$ (20-120min)    | 8                 | 123         | 7.40*                       |
| Circulating TNF- $\alpha$ (20-120min)   | 17                | 191         | -0.10                       |
| Circulating IL-10 (20-120min)           | 6                 | 46          | 14.49*                      |
| Circulating IL-2 (40-50min)             | 7                 | 35          | -0.38                       |
| LPS-stimulated IL-6 (11-30min)          | 20                | 57          | 1.67                        |
| LPS-stimulated IL-1 $\beta$ (20-120min) | 7                 | 160         | 4.93*                       |
| LPS-stimulated TNF- $\alpha$ (20-30min) | 9                 | 84          | 8.03*                       |
| PHA-stimulated IFN- $\gamma$ (0-10min)  | 5                 | 42          | 1.59                        |
| PHA-stimulaed IL-4 (0-10min)            | 5                 | 25          | -6.82*                      |

*Notes:* All times refer to minutes post-stress task; TSST = Trier Social Stress Test; IL = interleukin; CRP = C-reactive protein; TNF = tumor necrosis factor; IFN = interferon; ra = receptor antagonist; LPS = lipopolysaccharide; PHA = phytohaemagglutinin

\*  $p < .10$
